# Supplementary material
Source: PubMed Central journal article supplement (PMC7340572)
Supplement: NIHMS1569012-supplement-1.pdf [file NIHMS1569012-supplement-1.pdf]

**Supplemental Table 1.** Demographic Characteristics of Children Enrolled in Medicaid, by Mental Health Diagnosis Status

| <b>Characteristic<sup>1</sup></b> | <b>Children in Medicaid with no mental health diagnoses</b> | <b>Study sample of children with mental health diagnoses</b> |
|-----------------------------------|-------------------------------------------------------------|--------------------------------------------------------------|
| N                                 | 3,348,538                                                   | 775,945                                                      |
| Age in years, n (%)               |                                                             |                                                              |
| 3-8                               | 1,477,994 (44)                                              | 262,300 (34)                                                 |
| 9-12                              | 886,362 (27)                                                | 244,635 (32)                                                 |
| 13-17                             | 984,182 (29)                                                | 269,010 (35)                                                 |
| Male, N (%)                       | 1,656,193 (50)                                              | 471,278 (61)                                                 |
| Race/ethnicity, n (%)             |                                                             |                                                              |
| White, non-Hispanic               | 1,521,904 (45)                                              | 434,492 (56)                                                 |
| Black, non-Hispanic               | 1,183,768 (35)                                              | 222,327 (29)                                                 |
| Hispanic                          | 333,154 (10)                                                | 39,145 (5)                                                   |
| Other                             | 123,790 (4)                                                 | 17,184 (2)                                                   |
| Missing                           | 185,922 (6)                                                 | 62,797 (8)                                                   |
| Type of Medicaid plan, n (%)      |                                                             |                                                              |
| Fee-for-service                   | 1,223,210 (37)                                              | 259,473 (33)                                                 |
| Capitated                         | 2,125,328 (64)                                              | 516,472 (67)                                                 |
| Medicaid eligibility, n (%)       |                                                             |                                                              |
| Disability                        | 88,304 (3)                                                  | 85,596 (11)                                                  |
| Income                            | 3,188,123 (95)                                              | 677,949 (87)                                                 |
| Missing                           | 72,111 (2)                                                  | 12,400 (2)                                                   |

<sup>1</sup>Demographic characteristics varied significantly ( $p < 0.001$ ) between children with and without mental health diagnoses for all characteristics. Some percentages do not sum to 100% due to rounding.
